# Supplementary material
Source: MDPI journal article supplement (https://www.mdpi.com/1996-1073/16/15/5713)
Supplement: s1 [file s1]

## 1. Sour mixed-gas transport performance of selected polymeric materials

Table S1. Sour mixed-gas permeability data of selected polymers, measured at 35°C [1].

| Material                 | Pressure (psia) | H <sub>2</sub> S permeability (Barrer) | CO <sub>2</sub> permeability (Barrer) | CH <sub>4</sub> permeability (Barrer) | Acid gas (AG) permeability (Barrer) | H <sub>2</sub> S/CH <sub>4</sub> selectivity | CO <sub>2</sub> /CH <sub>4</sub> selectivity | AG/CH <sub>4</sub> selectivity | References |
|--------------------------|-----------------|----------------------------------------|---------------------------------------|---------------------------------------|-------------------------------------|----------------------------------------------|----------------------------------------------|--------------------------------|------------|
| AO-PIM-1 (Fresh)         | 1122            | 4375                                   | 796                                   | 59.4                                  | 5171                                | 74                                           | 13                                           | 87                             | [2]        |
|                          | 800             | 3582                                   | 705                                   | 47.63                                 | 4287                                | 75                                           | 15                                           | 90                             |            |
|                          | 400             | 2625                                   | 625                                   | 40.4                                  | 3250                                | 65                                           | 15                                           | 80                             |            |
| PIM-1                    | 1122            | 13800                                  | 4850                                  | 531                                   | 18650                               | 26                                           | 9                                            | 35                             |            |
|                          | 800             | 17000                                  | 4700                                  | 586                                   | 21700                               | 29                                           | 8                                            | 37                             |            |
|                          | 400             | 19800                                  | 4612                                  | 660                                   | 24412                               | 30                                           | 7                                            | 37                             |            |
| AO-PIM-1 (Rejuvenated)   | 1122            | 4050                                   | 796                                   | 67.5                                  | 4846                                | 60                                           | 12                                           | 72                             |            |
|                          | 800             | 3150                                   | 625                                   | 52.5                                  | 3775                                | 60                                           | 12                                           | 72                             |            |
|                          | 400             | 1875                                   | 500                                   | 40.76                                 | 2375                                | 46                                           | 12                                           | 58                             |            |
| Crosslinked PI: DEGMC    | 900             | 43                                     | 55                                    | 2.45                                  | 98                                  | 18                                           | 22                                           | 40                             | [3]        |
|                          | 700             | 38                                     | 51                                    | 1.9                                   | 89                                  | 20                                           | 27                                           | 47                             |            |
|                          | 400             | 26                                     | 52                                    | 1.7                                   | 78                                  | 15                                           | 31                                           | 46                             |            |
| TEGMC                    | 900             | 43                                     | 50                                    | 1.75                                  | 93                                  | 25                                           | 29                                           | 53                             |            |
|                          | 700             | 36                                     | 48                                    | 1.5                                   | 84                                  | 24                                           | 32                                           | 56                             |            |
|                          | 400             | 26                                     | 49                                    | 1.4                                   | 75                                  | 19                                           | 35                                           | 54                             |            |
| TetraMC                  | 900             | 30                                     | 42                                    | 1.45                                  | 72                                  | 21                                           | 29                                           | 50                             |            |
|                          | 700             | 25                                     | 41                                    | 1.3                                   | 66                                  | 19                                           | 32                                           | 51                             |            |
|                          | 300             | 24                                     | 48                                    | 1.2                                   | 72                                  | 20                                           | 40                                           | 60                             |            |
| 6FDA-DAM:DABA(3:2)       | 800             | 101                                    | 87                                    | 4.39                                  | 188                                 | 23                                           | 20                                           | 43                             | [4]        |
|                          | 100             | 25                                     | 66                                    | 1.43                                  | 91                                  | 17                                           | 46                                           | 64                             |            |
| Pure CA                  | 500             | 8.71                                   | 8.66                                  | 0.295                                 | 17                                  | 30                                           | 29                                           | 59                             |            |
|                          | 700             | 39.7                                   | 27.5                                  | 2.07                                  | 67                                  | 19                                           | 13                                           | 32                             |            |
| GCV-modified CA          | 500             | 204                                    | 129.4                                 | 9.35                                  | 333                                 | 22                                           | 14                                           | 36                             |            |
|                          | 700             | 190                                    | 136                                   | 9.5                                   | 326                                 | 20                                           | 14                                           | 34                             |            |
| 6FDA-DAM                 | 100             | 1076                                   | 737                                   | 27.87                                 | 1813                                | 39                                           | 26                                           | 65                             |            |
|                          | 500             | 612                                    | 411                                   | 15.81                                 | 1023                                | 39                                           | 26                                           | 65                             |            |
|                          | 100             | 332                                    | 582.9                                 | 22.4                                  | 915                                 | 15                                           | 26                                           | 41                             |            |
|                          | 100             | 246.5                                  | 435.9                                 | 16.4                                  | 682                                 | 15                                           | 27                                           | 42                             |            |
| 6FDA-DAM_aged            | 100             | 206.9                                  | 375.2                                 | 12.46                                 | 582                                 | 17                                           | 30                                           | 47                             | [5]        |
|                          | 800             | 495.1                                  | 301.1                                 | 15.87                                 | 796                                 | 31                                           | 19                                           | 50                             |            |
| 6FDA-DAM/DABA (3:2)_200C | 100             | 87.4                                   | 91                                    | 1.78                                  | 178                                 | 49                                           | 51                                           | 100                            | [6]        |
|                          | 100             | 27.1                                   | 76.9                                  | 1.44                                  | 104                                 | 19                                           | 53                                           | 72                             |            |
|                          | 100             | 22.8                                   | 58.4                                  | 1.145                                 | 81                                  | 20                                           | 51                                           | 71                             |            |
| PIM-6FDA-OH              | 500             | 36                                     | 55                                    | 1.97                                  | 91                                  | 18                                           | 28                                           | 46                             |            |
|                          | 700             | 63                                     | 53                                    | 2.10                                  | 116                                 | 30                                           | 25                                           | 55                             |            |

|                 |     |      |       |       |       |       |      |     |      |
|-----------------|-----|------|-------|-------|-------|-------|------|-----|------|
| 6F-PAI-1        | 900 | 4    | 8.1   | 0.25  | 12    | 17    | 32   | 49  | [7]  |
|                 | 600 | 4    | 11.4  | 0.33  | 15    | 12    | 35   | 47  |      |
|                 | 400 | 4    | 11.5  | 0.34  | 15    | 11    | 34   | 44  |      |
|                 | 800 | 4    | 7.5   | 0.62  | 12    | 7     | 12   | 19  |      |
|                 | 600 | 4    | 7.4   | 0.53  | 11    | 7     | 14   | 21  |      |
|                 | 400 | 3    | 7.4   | 0.45  | 11    | 7     | 16   | 24  |      |
| 6FDA/ODPA-DAM   | 100 | 130  | 149.4 | 4.42  | 279   | 29    | 34   | 63  | [8]  |
|                 | 195 | 131  | 114.2 | 3.64  | 246   | 36    | 31   | 67  |      |
|                 | 400 | 176  | 108.6 | 4.03  | 284   | 44    | 27   | 70  |      |
|                 | 616 | 291  | 147.4 | 6.55  | 438   | 44    | 23   | 67  |      |
|                 | 800 | 550  | 232.7 | 12.41 | 783   | 44    | 19   | 63  |      |
| Polynorbornenes |     |      |       |       |       |       |      |     |      |
| P0              | 800 | 4186 | 2741  | 644   | 6927  | 6.5   | 4.3  | 11  | [9]  |
| P1              | 800 | 3170 | 1413  | 387   | 4583  | 8.2   | 3.4  | 12  |      |
| P2              | 800 | 1852 | 626   | 164   | 2478  | 11.3  | 3.8  | 15  |      |
| P3              | 800 | 2683 | 818   | 160   | 3501  | 16.8  | 5.08 | 22  |      |
| P3a             | 800 | 1850 | 645   | 103   | 2495  | 17.9  | 6.2  | 24  |      |
| P3b             | 800 | 1446 | 634   | 101   | 2080  | 14.3  | 6.2  | 21  |      |
| P4              | 800 | 3556 | 1288  | 133   | 4844  | 26.8  | 9.2  | 37  |      |
| P5              | 800 | 2000 | 750   | 61    | 2750  | 32.6  | 12.9 | 45  |      |
| P6              | 800 | 1617 | 592   | 47    | 2209  | 34.7  | 13.8 | 47  |      |
| P7              | 800 | 3130 | 750   | 65    | 3880  | 47.8  | 11.6 | 59  |      |
| P0              | 800 | 6785 | 5382  | 712   | 12167 | 9.53  | 4.4  | 17  |      |
| P1              | 800 | 6495 | 4902  | 722   | 11397 | 9.00  | 3.48 | 16  |      |
| P2              | 800 | 5863 | 4204  | 493   | 10067 | 11.90 | 3.68 | 20  |      |
| P3              | 800 | 6372 | 4356  | 377   | 10728 | 16.90 | 4.53 | 28  |      |
| P3a             | 800 | 5856 | 4075  | 329   | 9931  | 17.80 | 5.14 | 30  |      |
| P3b             | 800 | 5700 | 4182  | 370   | 9882  | 15.40 | 5.14 | 27  |      |
| P4              | 800 | 7000 | 4742  | 254   | 11742 | 27.60 | 7.14 | 46  |      |
| P5              | 800 | 6181 | 4258  | 206   | 10439 | 30.00 | 8.88 | 51  |      |
| P6              | 800 | 6181 | 4333  | 196   | 10514 | 31.60 | 9.5  | 54  |      |
| P7              | 800 | 6910 | 4371  | 182   | 11281 | 37.90 | 7.95 | 62  |      |
| Polyurethanes   |     |      |       |       |       |       |      |     |      |
| PU1             | 147 | 239  | 78    | 11    | 317   | 21    | 7    | 28  | [10] |
|                 | 147 | 183  | 56    | 8     | 239   | 23    | 7    | 29  |      |
| PU2             | 147 | 613  | 197   | 33    | 810   | 19    | 6    | 25  |      |
|                 | 147 | 618  | 195   | 35    | 813   | 18    | 6    | 23  |      |
| PU3             | 147 | 271  | 59    | 5     | 330   | 58    | 13   | 70  |      |
|                 | 147 | 280  | 62    | 5     | 342   | 55    | 12   | 67  |      |
| PU4             | 147 | 199  | 45    | 3     | 244   | 74    | 17   | 90  |      |
|                 | 147 | 223  | 51    | 3     | 274   | 66    | 15   | 81  |      |
| PU4             | 60  | 95   | 21    | 1     | 116   | 106   | 23   | 129 |      |
|                 | 147 | 101  | 22    | 1     | 123   | 101   | 22   | 123 |      |
|                 | 200 | 115  | 25    | 1     | 140   | 105   | 23   | 127 |      |

|                                                            |            |        |        |       |        |      |       |       |      |
|------------------------------------------------------------|------------|--------|--------|-------|--------|------|-------|-------|------|
|                                                            | 60         | 104    | 22     | 1     | 126    | 95   | 20    | 115   |      |
|                                                            | 147        | 123    | 25     | 1     | 148    | 95   | 20    | 114   |      |
|                                                            | 200        | 130    | 27     | 1     | 157    | 93   | 19    | 112   |      |
| <b>Pebax MX series</b>                                     | 147        | 695    | 155    | 14    | 850    | 50   | 11    | 62    |      |
|                                                            | 147        | 553    | 122    | 10    | 675    | 54   | 12    | 66    |      |
|                                                            | 147        | 248    | 69     | 5     | 317    | 51   | 14    | 65    |      |
|                                                            | 147        | 175    | 40     | 4     | 215    | 49   | 11    | 60    |      |
| <b>Pebax SA00</b>                                          | 147        | 312    | 84     | 13    | 396    | 24   | 6     | 30    |      |
|                                                            | 147        | 888    | 243    | 43    | 1131   | 21   | 6     | 27    |      |
|                                                            | 147        | 38     | 7      | 2     | 45     | 20   | 4     | 24    |      |
|                                                            | 147        | 8      | 4      | 1     | 12     | 15   | 8     | 23    |      |
| <b>Crosslinked PEO</b>                                     |            |        |        |       |        |      |       |       |      |
| <b>MW 200</b>                                              | 800        | 0.07   | 0.07   | 0.001 | 0.14   | 66   | 73    | 139   |      |
| <b>MW 300</b>                                              | 800        | 0.24   | 0.11   | 0.003 | 0.35   | 37   | 79    | 116   |      |
| <b>MW 400</b>                                              | 800        | 0.50   | 0.20   | 0.01  | 0.7    | 41   | 100   | 141   | [11] |
| <b>MW 600</b>                                              | 800        | 9.27   | 2.29   | 0.09  | 11.55  | 26   | 104   | 130   |      |
| <b>MW 1000</b>                                             | 800        | 25.94  | 5.20   | 0.24  | 31.14  | 22   | 110   | 133   |      |
| <b>MW 2050</b>                                             | 800        | 2.95   | 0.69   | 0.03  | 3.64   | 28   | 118   | 146   |      |
| <b>Polyphosphazene</b><br><b>1</b><br><b>2</b><br><b>3</b> | 30         | 14.1   | 7.5    | 0.5   | 21.6   | 15.0 | 28.2  | 43.2  |      |
|                                                            | (pure-gas) | 588.0  | 152.3  | 9.4   | 740.3  | 16.2 | 62.6  | 78.8  | [12] |
|                                                            |            | 1130.0 | 250.0  | 14.0  | 1380.0 | 17.9 | 80.7  | 98.6  |      |
| <b>PA12-PEO-50</b>                                         | 200        | 1030   | 152.7  | 10.5  | 1182.7 | 14.5 | 98.1  | 112.6 |      |
|                                                            | 500        | 1929   | 285.5  | 21.3  | 2214.4 | 13.4 | 90.6  | 104.0 |      |
|                                                            | 800        | 2775   | 417.7  | 34.7  | 3192.3 | 12.0 | 80.0  | 92.0  |      |
| <b>PA6-PEO-60</b>                                          | 200        | 651    | 98.0   | 5.7   | 748.9  | 17.1 | 114.2 | 131.4 |      |
|                                                            | 500        | 1380   | 209.2  | 14.9  | 1588.9 | 14.1 | 92.6  | 106.6 |      |
|                                                            | 800        | 2083   | 331.9  | 25.9  | 2414.6 | 12.8 | 80.4  | 93.2  |      |
| <b>PA12-PTMEO-80</b>                                       | 200        | 2180   | 487.9  | 65.6  | 2667.5 | 7.5  | 33.2  | 40.7  |      |
|                                                            | 500        | 3567   | 852.6  | 132.6 | 4419.4 | 6.4  | 26.9  | 33.3  | [13] |
|                                                            | 800        | 4713   | 1263.8 | 305.4 | 5976.9 | 4.8  | 15.4  | 19.6  |      |
| <b>PA12-PEO-a-50</b>                                       | 200        | 481    | 94.2   | 8.9   | 575.3  | 10.6 | 54.1  | 64.6  |      |
|                                                            | 500        | 920    | 173.5  | 17.5  | 1093.6 | 9.9  | 52.6  | 62.5  |      |
|                                                            | 800        | 1444   | 270.8  | 28.3  | 1714.8 | 9.6  | 51.0  | 60.6  |      |
| <b>PA6-PTMEO-33</b>                                        | 200        | 145    | 29.0   | 3.3   | 173.7  | 8.7  | 43.8  | 52.6  |      |
|                                                            | 500        | 322    | 61.7   | 7.4   | 383.3  | 8.3  | 43.5  | 51.8  |      |
|                                                            | 800        | 576    | 111.0  | 13.3  | 687.0  | 8.4  | 43.3  | 51.7  |      |

## 2. Publications discussing polymeric membranes for H<sub>2</sub>S removal from natural gas

Figure S1 shows the increase in the number of publications discussing polymeric membranes for sour gas purification over the past two decades.

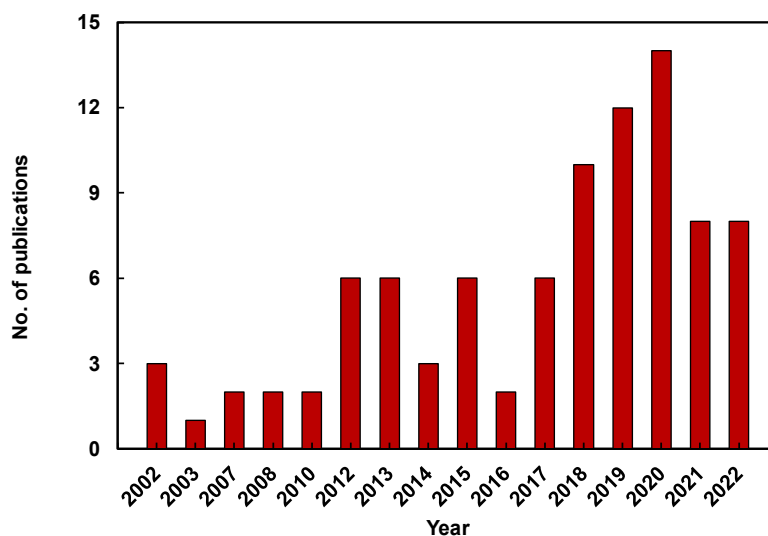

Figure S1. Number of publications on polymeric membranes for sour gas purifications over the past two decades. (Data extracted from Web of Science™).

## References

- [1] A. Hayek, Y.A. Shalabi, A. Alsamah, Sour mixed-gas upper bounds of glassy polymeric membranes, *Sep. Purif. Technol.* 277 (2021) 119535. <https://doi.org/10.1016/j.seppur.2021.119535>.
- [2] S. Yi, B. Ghanem, Y. Liu, I. Pinnau, W.J. Koros, Ultrasensitive glassy polymer membranes with unprecedented performance for energy-efficient sour gas separation, *Sci. Adv.* 5 (2019) eaaw5459. <https://doi.org/10.1126/sciadv.aaw5459>.
- [3] B. Kraftschik, W.J. Koros, Cross-Linkable polyimide membranes for improved plasticization resistance and permselectivity in sour gas separations, *Macromolecules*. 46 (2013) 6908–6921. <https://doi.org/10.1021/ma401542j>.
- [4] C.S.K. Achoundong, N. Bhuwania, S.K. Burgess, O. Karvan, J.R. Johnson, W.J. Koros, Silane modification of cellulose acetate dense films as materials for acid gas removal, *Macromolecules*. 46 (2013) 5584–5594. <https://doi.org/10.1021/ma4010583>.
- [5] Y. Liu, Z. Liu, G. Liu, W. Qiu, N. Bhuwania, D. Chinn, W.J. Koros, Surprising plasticization benefits in natural gas upgrading using polyimide membranes, *J. Membr. Sci.* 593 (2020) 117430. <https://doi.org/10.1016/j.memsci.2019.117430>.
- [6] S. Yi, X. Ma, I. Pinnau, W.J. Koros, A high-performance hydroxyl-functionalized polymer of intrinsic microporosity for an environmentally attractive membrane-based approach to decontamination of sour natural gas, *J. Mater. Chem. A*. 3 (2015) 22794–22806. <https://doi.org/10.1039/C5TA05928C>.

- [7] J. Vaughn, W.J. Koros, Effect of the amide bond diamine structure on the CO<sub>2</sub>, H<sub>2</sub>S, and CH<sub>4</sub> transport properties of a series of novel 6FDA-based polyamide-imides for natural gas purification, *Macromolecules*. 45 (2012) 7036–7049. <https://doi.org/10.1021/ma301249x>.
- [8] Y. Liu, Z. Chen, W. Qiu, G. Liu, M. Eddaoudi, W.J. Koros, Penetrant competition and plasticization in membranes: How negatives can be positives in natural gas sweetening, *J. Membr. Sci.* 627 (2021) 119201. <https://doi.org/10.1016/j.memsci.2021.119201>.
- [9] J.A. Lawrence, D.J. Harrigan, C.R. Maroon, S.A. Sharber, B.K. Long, B.J. Sundell, Promoting acid gas separations via strategic alkoxysilyl substitution of vinyl-added poly(norbornene)s, *J. Membr. Sci.* 616 (2020) 118569. <https://doi.org/10.1016/j.memsci.2020.118569>.
- [10] G. Chatterjee, A.A. Houde, S.A. Stern, Poly(ether urethane) and poly(ether urethane urea) membranes with high H<sub>2</sub>S/CH<sub>4</sub> selectivity, *J. Membr. Sci.* 135 (1997) 99–106. [https://doi.org/10.1016/S0376-7388\(97\)00134-8](https://doi.org/10.1016/S0376-7388(97)00134-8).
- [11] D.J. Harrigan, J.A. Lawrence, H.W. Reid, J.B. Rivers, J.T. O'Brien, S.A. Sharber, B.J. Sundell, Tunable sour gas separations: Simultaneous H<sub>2</sub>S and CO<sub>2</sub> removal from natural gas via crosslinked telechelic poly(ethylene glycol) membranes, *J. Membr. Sci.* 602 (2020) 117947. <https://doi.org/10.1016/j.memsci.2020.117947>.
- [12] C.J. Orme, F.F. Stewart, Mixed gas hydrogen sulfide permeability and separation using supported polyphosphazene membranes, *J. Membr. Sci.* 253 (2005) 243–249. <https://doi.org/10.1016/j.memsci.2004.12.034>.
- [13] D.J. Harrigan, J. Yang, B.J. Sundell, J.A. Lawrence, J.T. O'Brien, M.L. Ostraat, Sour gas transport in poly(ether-*b*-amide) membranes for natural gas separations, *J. Membr. Sci.* 595 (2020) 117497. <https://doi.org/10.1016/j.memsci.2019.117497>.
